# Supplementary material
Source: publisher site journal article supplement (http://www.sagepub.com/fitzgerald/study/materials/appendices/app_f.pdf)
Supplement: Supplementary file 1 [file app_f.pdf]

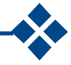

# Appendix F: Student's $t$ Distribution Table

## How to Use the Student's $t$ Distribution Table

First, determine whether a one-tailed or a two-tailed test is appropriate—that is, whether you will be using the column headings in the first or the second row of the table. Next, select the level of significance for your test from the level of significance row you have selected; the column of the table you will be using has now been determined. Finally, calculate  $df$  for your data and locate its value (or nearest value) in the left-hand column, thereby determining the row of the critical values in the table you will be using. The quantity in the cell of the table at the intersection of the row and the column you have identified is the critical value of  $t$  for your test. If you have calculated a  $t$  whose value is equal to or larger than the quantity in this cell, the difference between means is statistically significant at the level you have chosen.

Table F.1 Student's  $t$  Distribution

| $df$ | Level of Significance for One-Tailed Test |       |        |        |        |         |
|------|-------------------------------------------|-------|--------|--------|--------|---------|
|      | .10                                       | .05   | .025   | .01    | .005   | .0005   |
|      | Level of Significance for Two-Tailed Test |       |        |        |        |         |
|      | .20                                       | .10   | .05    | .02    | .01    | .001    |
| 1    | 3.078                                     | 6.314 | 12.706 | 31.821 | 63.657 | 636.619 |
| 2    | 1.886                                     | 2.920 | 4.303  | 6.965  | 9.925  | 31.598  |
| 3    | 1.638                                     | 2.353 | 3.182  | 4.541  | 5.841  | 12.941  |
| 4    | 1.533                                     | 2.132 | 2.776  | 3.747  | 4.604  | 8.610   |
| 5    | 1.476                                     | 2.015 | 2.571  | 3.365  | 4.032  | 6.859   |
| 6    | 1.440                                     | 1.943 | 2.447  | 3.143  | 3.707  | 5.959   |

(Continued)

**Table F.1** Student's *t* Distribution (Continued)

| <i>df</i> | <i>Level of Significance for One-Tailed Test</i> |            |             |            |             |              |
|-----------|--------------------------------------------------|------------|-------------|------------|-------------|--------------|
|           | <i>.10</i>                                       | <i>.05</i> | <i>.025</i> | <i>.01</i> | <i>.005</i> | <i>.0005</i> |
|           | <i>Level of Significance for Two-Tailed Test</i> |            |             |            |             |              |
|           | <i>.20</i>                                       | <i>.10</i> | <i>.05</i>  | <i>.02</i> | <i>.01</i>  | <i>.001</i>  |
| 7         | 1.415                                            | 1.895      | 2.365       | 2.998      | 3.499       | 5.405        |
| 8         | 1.397                                            | 1.860      | 2.306       | 2.896      | 3.355       | 5.041        |
| 9         | 1.383                                            | 1.833      | 2.262       | 2.821      | 3.250       | 4.781        |
| 10        | 1.372                                            | 1.812      | 2.228       | 2.764      | 3.169       | 4.587        |
| 11        | 1.363                                            | 1.796      | 2.201       | 2.718      | 3.106       | 4.437        |
| 12        | 1.356                                            | 1.782      | 2.179       | 2.681      | 3.055       | 4.318        |
| 13        | 1.350                                            | 1.771      | 2.160       | 2.650      | 3.012       | 4.221        |
| 14        | 1.345                                            | 1.761      | 2.145       | 2.624      | 2.977       | 4.140        |
| 15        | 1.341                                            | 1.753      | 2.131       | 2.602      | 2.947       | 4.073        |
| 16        | 1.337                                            | 1.746      | 2.120       | 2.583      | 2.921       | 4.015        |
| 17        | 1.333                                            | 1.740      | 2.110       | 2.567      | 2.898       | 3.965        |
| 18        | 1.330                                            | 1.734      | 2.101       | 2.552      | 2.878       | 3.922        |
| 19        | 1.328                                            | 1.729      | 2.093       | 2.539      | 2.861       | 3.883        |
| 20        | 1.325                                            | 1.725      | 2.086       | 2.528      | 2.845       | 3.850        |
| 21        | 1.323                                            | 1.721      | 2.080       | 2.518      | 2.831       | 3.819        |
| 22        | 1.321                                            | 1.717      | 2.074       | 2.508      | 2.819       | 3.792        |
| 23        | 1.319                                            | 1.714      | 2.069       | 2.500      | 2.807       | 3.767        |
| 24        | 1.318                                            | 1.711      | 2.064       | 2.492      | 2.797       | 3.745        |
| 25        | 1.316                                            | 1.708      | 2.060       | 2.485      | 2.787       | 3.725        |
| 26        | 1.315                                            | 1.706      | 2.056       | 2.479      | 2.779       | 3.707        |
| 27        | 1.314                                            | 1.703      | 2.052       | 2.473      | 2.771       | 3.690        |
| 28        | 1.313                                            | 1.701      | 2.048       | 2.467      | 2.763       | 3.674        |
| 29        | 1.311                                            | 1.699      | 2.045       | 2.462      | 2.756       | 3.659        |
| 30        | 1.310                                            | 1.697      | 2.042       | 2.457      | 2.750       | 3.646        |
| 40        | 1.303                                            | 1.684      | 2.021       | 2.423      | 2.704       | 3.551        |
| 60        | 1.296                                            | 1.671      | 2.000       | 2.390      | 2.660       | 3.460        |
| 120       | 1.289                                            | 1.658      | 1.980       | 2.358      | 2.617       | 3.373        |
| ∞         | 1.282                                            | 1.645      | 1.960       | 2.326      | 2.576       | 3.291        |

Source: Adapted from Table III of R. A. Fisher and F. Yates. *Statistical Tables for Biological, Agricultural and Medical Research*, 1948 edition. Reprinted by permission of Addison Wesley Longman Ltd.
